# Supplementary material
Source: PubMed Central journal article supplement (PMC2863181)

**Supplemental Table 1. Intermolecular interactions in TGF- $\beta$ 1/T $\beta$ RI/T $\beta$ RII ternary complex**

| Residue/Atom                             | Residue/Atom                   | Distance (Å) |
|------------------------------------------|--------------------------------|--------------|
| <b>TGF-<math>\beta</math>1</b>           | <b>T<math>\beta</math>RII</b>  |              |
| <i>Hydrogen bonds and salt bridges</i>   |                                |              |
| Arg 25 Nh1                               | Glu 119 O $\epsilon$ 1         | 3.5          |
| Arg 25 Nh2                               | Glu 119 O $\epsilon$ 2         | 2.6          |
| His 34 N $\epsilon$ 2                    | Ser 49 O                       | 2.8          |
| Tyr 91 O                                 | Ile 53 N                       | 2.8          |
| Gly 93 N                                 | Ile 53 O                       | 2.9          |
| Gly 93 O                                 | Ser 52 O $\gamma$              | 3.2          |
| Arg 94 Nh1                               | Asp 32 O $\delta$ 1            | 2.6          |
| Arg 94 N $\epsilon$                      | Asp 32 O $\delta$ 2            | 2.9          |
| <i>Hydrophobic contacts</i> <sup>a</sup> |                                |              |
| Tyr 91                                   | Ile 50, Ser 52                 |              |
| Arg 94, Gly 93                           | Phe 30                         |              |
| <b>TGF-<math>\beta</math>1 (A)</b>       | <b>T<math>\beta</math>RI</b>   |              |
| <i>Hydrophobic contacts</i>              |                                |              |
| Trp 30                                   | Phe 60                         |              |
| Trp 32, Tyr 90                           | Pro 55                         |              |
| Leu 101                                  | Ile 54                         |              |
| <b>TGF-<math>\beta</math>1 (B)</b>       | <b>T<math>\beta</math>RI</b>   |              |
| <i>Hydrogen bonds</i>                    |                                |              |
| Tyr 6 OH                                 | His 15 N $\epsilon$ 2          | 3.2          |
| <i>Hydrophobic contacts</i>              |                                |              |
| Ala 1, Leu 2, Tyr 6                      | Leu 16                         |              |
| Asn 5                                    | Lys 19                         |              |
| Tyr 6                                    | His 15, Leu 16                 |              |
| Ile 51                                   | Phe 31                         |              |
| Gln 57                                   | Ile 54                         |              |
| Lys 60                                   | Val 61                         |              |
| <b>T<math>\beta</math>RII</b>            | <b>T<math>\beta</math>RI</b>   |              |
| <i>Hydrophobic contacts</i>              |                                |              |
| Ala 21                                   | Cys 77                         |              |
| Val 22                                   | Leu 29, Cys 76, Cys 77, Asn 78 |              |
| Phe 24                                   | Leu 29, Pro 59                 |              |
| Pro 25                                   | Arg 58                         |              |
| Leu 27                                   | Arg 58                         |              |
| Ile 53                                   | Arg 58                         |              |

<sup>a</sup> Carbon-carbon contacts  $\leq 4.0$  Å

## FIGURE LEGENDS

**Supplemental figure 1.** Structural superposition demonstrating overall similar manner of complex assembly observed with TGF- $\beta$ 1 and - $\beta$ 3. (A) Overlay of TGF- $\beta$ 1 and - $\beta$ 3 ternary complex structures. Structures were superimposed using the full ligand dimer and the corresponding bound T $\beta$ RII. Components of the TGF- $\beta$ 1 ternary complex are colored (TGF- $\beta$ 1<sub>A</sub>-monomer – light blue, TGF- $\beta$ 1<sub>B</sub>-monomer – dark blue, T $\beta$ RI – red, T $\beta$ RII – yellow) whereas those of the TGF- $\beta$ 3 ternary complex are grey. (B) Overlay of T $\beta$ RI from the TGF- $\beta$ 1 and TGF- $\beta$ 3 ternary complexes (red and grey, respectively) showing that the structures are overall very similar (in spite of its somewhat different positioning in the two ternary complexes; Fig 1C).

**Supplemental figure 2.** SPR equilibrium analysis of the interaction between T $\beta$ RII and TGF- $\beta$ 1, TGF- $\beta$ 2 and TGF- $\beta$ 3 and between T $\beta$ RI and TGF- $\beta$ 2 and TGF- $\beta$ 3. (A-C) Sensorgrams and binding isotherms obtained as T $\beta$ RII was injected. Traces correspond to triplicate measurements of 2-fold serial dilutions of the receptor over the ranges shown. Surface densities were 185, 339, and 165 resonance units (RU) for TGF- $\beta$ 1 (A), - $\beta$ 2 (B), and - $\beta$ 3 (C), respectively. Binding isotherms correspond to plots of the response at equilibrium as a function of receptor concentration, which were fit to a hyperbolic equation using Scrubber 2 software. (D-E) Sensorgrams and binding isotherms obtained as T $\beta$ RI was injected. Traces correspond to triplicate measurements of 2-fold serial dilutions of the receptor over the ranges shown. Surface densities were 339 and 451 resonance units (RU) for TGF- $\beta$ 2 (D), and - $\beta$ 3 (E), respectively. Data is not shown for TGF- $\beta$ 1 since the maximum binding observed (8 RU at 16  $\mu$ M on a 686RU surface) was too weak to permit an equilibrium analysis.

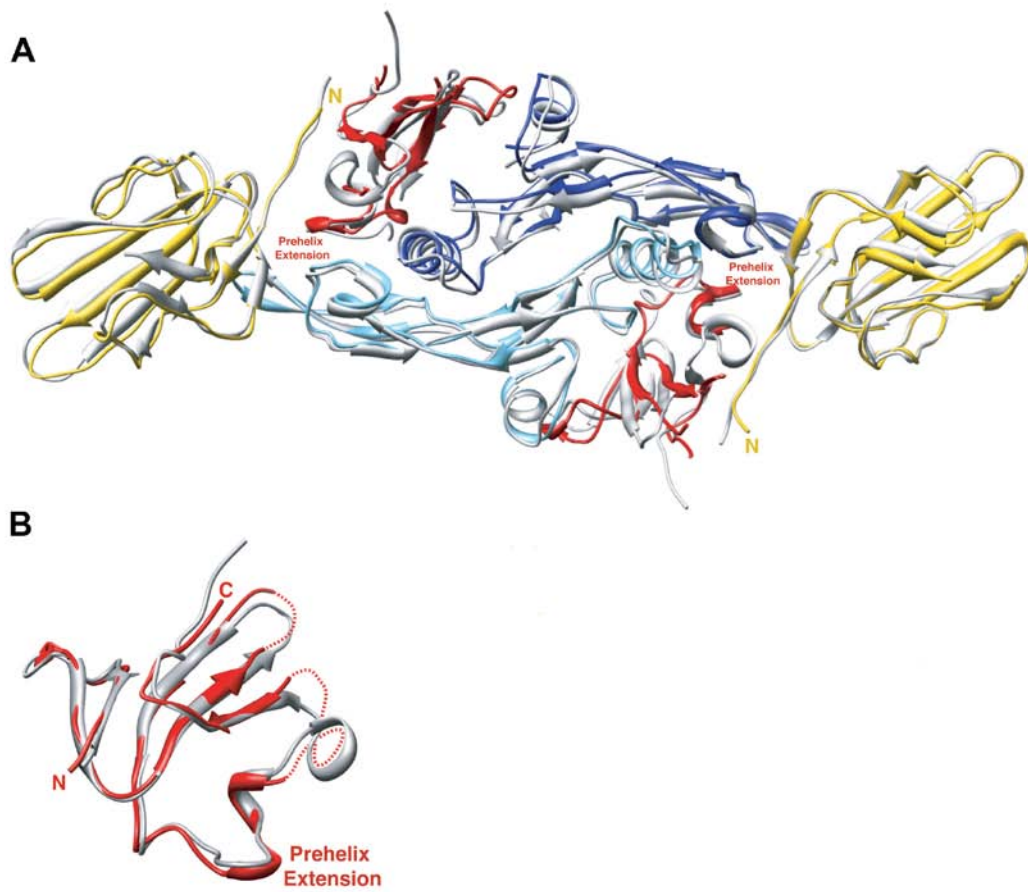

Supplemental Figure 1

## T $\beta$ RII Binding

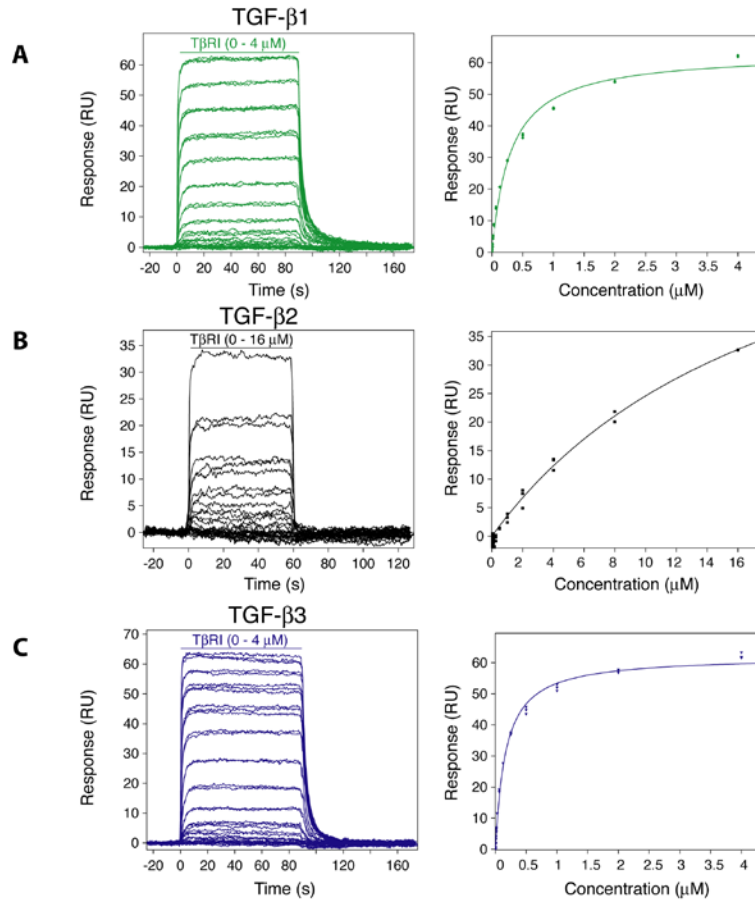

## T $\beta$ RI Binding

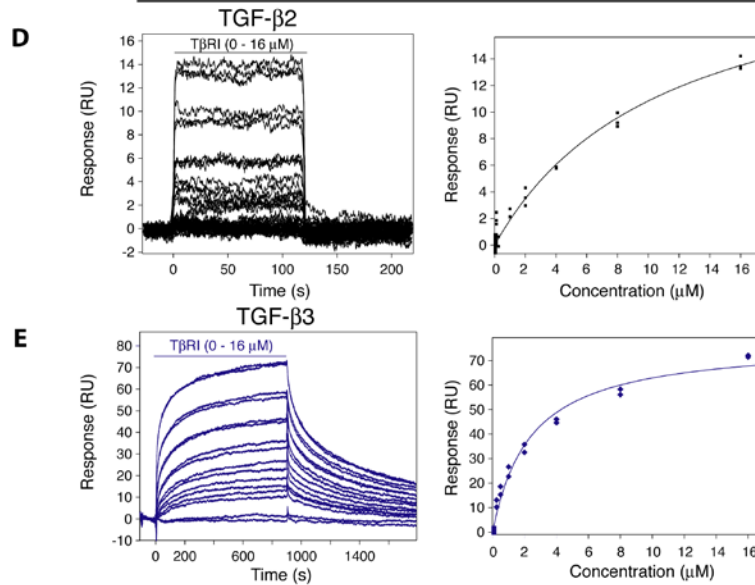

Supplement: supp_M109.079921_jbc.M109.079921-1.pdf [file supp_M109.079921_jbc.M109.079921-1.pdf]
